# Supplementary material
Source: publisher site journal article supplement (https://www.dovepress.com/article/550446)
Supplement: Supplementary file 1 [file 550446%20Revised%20Supplementary%20tables_1_1.docx]

| **Supplementary table 1. Correlations of age and gender with ocular metrics** | | | | | |
| --- | --- | --- | --- | --- | --- |
| **Parameter** | **Gender (P)** | **Age (P)** | **Parameter** | **Gender (P)** | **Age (P)** |
| **General Ocular Metrics** |  |  | **Keratometry & Corneal Geometry** |  |  |
| SER | **0.008** | 0.099 | Anterior K1 | **0.005** | 0.372 |
| BCVA | 0.140 | 0.961 | Anterior K2 | **0.047** | 0.376 |
| NCT | 0.752 | 0.628 | Anterior axis (Axis F) | 0.353 | 0.692 |
| AL | **0.020** | 0.241 | Anterior astigmatism (Astig F) | 0.417 | **0.407** |
| CCT | 0.072 | 0.403 | Anterior asphericity (Q F) | 0.236 | **0.036** |
| OSDI | 0.399 | **0.037** | Posterior K1 | **0.005** | **0.342** |
| PCE | 0.159 | **0.196** | Posterior K2 | **0.047** | **0.970** |
| PME | 0.526 | **0.047** | Posterior axis (Axis B) | 0.701 | **0.488** |
| PTE | 0.935 | 0.317 | Posterior astigmatism (Astig B) | 0.443 | **0.292** |
|  |  |  | Posterior asphericity (Q B) | 0.761 | **0.484** |
|  |  |  | Central corneal volume (CCV) | 0.483 | 0.202 |
| **Corneal Optical Density (COD) by Zone** | **Gender (P)** | **Age (P)** | **Corneal Nerve Metrics (IVCM)** | **Gender (P)** | **Age (P)** |
| ACOD 0–2 mm | 0.902 | 0.250 | CNFD | **0.032** | 0.852 |
| ACOD 2–6 mm | 0.958 | 0.571 | CNBD | 0.064 | 0.663 |
| ACOD 6–10 mm | 0.147 | **0.002** | CNFL | 0.050 | 0.695 |
| ACOD 10–12 mm | 0.230 | 0.075 | CTBD | 0.481 | 0.922 |
| Total ACOD | 0.465 | 0.203 | CNFA | 0.670 | 0.903 |
| MCOD 0–2 mm | 0.609 | 0.519 | CNFW | 0.073 | 0.784 |
| MCOD 2–6 mm | 0.516 | 0.892 | CNFractal dimension | 0.054 | 0.290 |
| MCOD 6–10 mm | 0.065 | **<0.001** | DC density | **0.002** | 0.101 |
| MCOD 10–12 mm | **0.037** | **0.018** |  |  |  |
| Total MCOD | 0.133 | **0.008** |  |  |  |
| PCOD 0–2 mm | 0.483 | 0.445 |  |  |  |
| PCOD 2–6 mm | 0.467 | 0.737 |  |  |  |
| PCOD 6–10 mm | 0.138 | **0.001** |  |  |  |
| PCOD 10–12 mm | **0.049** | 0.057 |  |  |  |
| Total PCOD | 0.226 | 0.225 |  |  |  |
| Total COD 0–2 mm | 0.755 | 0.325 |  |  |  |
| Total COD 2–6 mm | 0.670 | 0.721 |  |  |  |
| Total COD 6–10 mm | 0.099 | **<0.001** |  |  |  |
| Total COD 10–12 mm | 0.062 | **0.021** |  |  |  |
| Total COD | 0.252 | 0.093 |  |  |  |
| 1. P-values are derived from Pearson’s correlation analysis. Statistically significant correlations (P < 0.05) are indicated in bold red text. 2. SER, spherical equivalent refraction; BCVA, best corrected visual acuity; NCT, non-contact tonometry; AL, axial length; CNFD, corneal nerve fiber density; CNBD, corneal nerve branch density; CNFL, corneal nerve fiber length; CTBD, corneal total branch density; CNFA, corneal nerve fiber area; CNFW, central nerve fiber width; CNFrD, corneal nerve fractal dimension; ACOD6-10, anterior corneal optical density with 6-10mm; PCOD0-2, PCOD2-6, PCOD6-10, Total PCOD, posterior corneal optical density within 0-2mm, 2-6mm, 6-10mm, and total; TCOD, total corneal optical density; OSDI, ocular surface disease index; CCT, central corneal thickness; CCV, corneal curvature volume; DC, dendritiform cell. | | | | | |

| **Supplementary table 2. Correlation Between Clinical Metrics and Corneal Optical Density (COD) in Different Zones** | | | | | | | |
| --- | --- | --- | --- | --- | --- | --- | --- |
|  | ACOD0-2 | | | ACOD2-6 | ACOD6-10 | ACOD10-12 | Total ACOD |
| Spherical Equivalent Refraction | **0.038 (-0.178)** | | | **0.013 (-0.212)** | 0.952 (0.005) | 0.583 (-0.048) | 0.103 (-0.141) |
| Spherical Equivalent Refraction Severity | 0.063 (0.160) | | | **0.030 (0.186)** | 0.843 (-0.017) | 0.572 (0.050) | 0.155 (0.122) |
| Axial Length (AL) | **0.038 (0.178)** | | | **0.010 (0.220)** | 0.342 (-0.085) | 0.543 (-0.053) | 0.245 (0.100) |
| Central Nerve Fiber Width (CNFW) | 0.836 (-0.018) | | | 0.769 (-0.025) | **0.021 (-0.198)** | 0.057 (-0.164) | 0.131 (-0.130) |
| Anterior Keratometry K1 (K1 F) | 0.847 (-0.017) | | | 0.402 (-0.072) | 0.471 (0.062) | **0.009(0.224)** | 0.673 (0.036) |
| Anterior Keratometry K2 (K2 F) | 0.114 (0.136) | | | 0.376 (0.077) | 0.096 (0.143) | **0.004 (0.243)** | 0.062 (0.160) |
| Anterior Astigmatism (AstigF) | **0.001 (0.286)** | | | **0.002 (0.269)** | **0.038 (0.178)** | 0.256 (0.098) | **0.003 (0.252)** |
| Anterior Asphericity indices (Asph.QF) | 0.873 (-0.014) | | | 0.902 (-0.011) | 0.071 (-0.156) | **0.001 (-0.279)** | 0.097 (-0.143) |
| Posterior Keratometry K1 (K1 B) | 0.681 (0.036) | | | 0.461 (0.064) | 0.139 (-0.128) | **0.003 (-0.253)** | 0.469 (-0.063) |
| Posterior Keratometry K2 (K2 B) | 0.642 (-0.040) | | | 0.987 (0.001) | **0.029 (-0.187)** | **0.013 (-0.213)** | 0.200 (-0.111) |
| Posterior Asphericity indices (Asph.QB) | 0.058 (0.163) | | | 0.067 (0.158) | **0.001 (-0.286)** | **<0.001 (-0.305)** | 0.332 (-0.084) |
| Posterior Corneal Elevation (PCE) | **0.033 (-0.183)** | | | **0.027 (-0.189)** | 0.605 (0.045) | 0.534 (0.054) | 0.353 (-0.080) |
|  | | MCOD0-2 | MCOD2-6 | | MCOD6-10 | MCOD10-12 | Total MCOD |
| Spherical Equivalent Refraction | | **0.010 (-0.220)** | **0.013 (-0.212)** | | 0.598 (-0.046) | 0.161 (-0.121) | **0.044 (-0.173)** |
| Spherical Equivalent Refraction Severity | | **0.008 (0.225)** | **0.012 (0.214)** | | 0.617 (0.043) | 0.299(0.090) | 0.058 (0.163) |
| Axial Length (AL) | | **0.010 (0.220)** | **0.018 (0.202)** | | 0.484 (-0.061) | 0.938 (0.007) | 0.187 (0.114) |
| Central Corneal Thickness (CCT) | | **0.002 (-0.257)** | **0.006 (-0.236)** | | 0.179 (-0.116) | 0.352 (-0.080) | **0.017 (-0.205)** |
| Central Corneal Volume (CCV) | | **0.024 (-0.193)** | **0.030 (-0.186)** | | 0.367 (-0.078) | 0.879 (0.013) | 0.108 (-0.138) |
| Central Nerve Fiber Width (CNFW) | | 0.986 (0.001) | 0.824 (-0.019) | | **0.044 (-0.173)** | 0.344 (-0.082) | 0.341 (-0.082) |
| Anterior Keratometry K1 (K1 F) | | 0.754 (-0.027) | 0.543 (-0.053) | | 0.448 (0.066) | **0.022 (0.196)** | 0.659 (0.038) |
| Anterior Keratometry K2 (K2 F) | | 0.203 (0.110) | 0.360 (0.079) | | 0.071(0.155) | **0.006 (0.233)** | 0.090 (0.146) |
| Anterior Astigmatism (AstigF) | | **0.003 (0.252)** | **0.005 (0.239)** | | **0.022 (0.196)** | 0.153 (0.123) | **0.010 (0.220)** |
| Anterior Asphericity indices (Asph.QF) | | 0.548 (0.052) | 0.787 (0.023) | | **0.046 (-0.171)** | **0.009 (-0.225)** | 0.235 (-0.102) |
| Posterior Keratometry K1 (K1 B) | | 0.498(0.059) | 0.429 (0.068) | | 0.167 (-0.119) | **0.003 (-0.257)** | 0.510 (-0.057) |
| Posterior Keratometry K2 (K2 B) | | 0.922 (0.008) | 0.766 (0.026) | | **0.046 (-0.171)** | **0.008 (-0.227)** | 0.319 (-0.086) |
| Posterior Asphericity indices (Asph.QB) | | **0.010 (0.220)** | **0.040 (0.176)** | | **0.006 (-0.235)** | **0.042 (-0.175)** | 0.931 (-0.008) |
| Posterior Corneal Elevation (PCE) | | **0.012 (-0.214)** | **0.023 (-0.194)** | | 0.747 (0.028) | 0.361 (-0.079) | 0.126 (-0.132) |
|  | | PCOD0-2 | PCOD2-6 | | PCOD6-10 | PCOD10-12 | Total PCOD |
| Spherical Equivalent Refraction | | **0.001 (-0.285)** | **0.001 (-0.270)** | | **0.016 (-0.206)** | 0.104 (-0.140) | **0.004 (-0.244)** |
| Spherical Equivalent Refraction Severity | | **0.002 (0.265)** | **0.003 (0.251)** | | **0.027 (0.189)** | 0.135 (0.129) | **0.008 (0.227)** |
| Axial Length (AL) | | **0.004 (0.244)** | **0.008 (0.226)** | | 0.247 (0.100) | 0.650 (0.039) | **0.041(0.175)** |
| Central Corneal Thickness (CCT) | | **0.001 (-0.278)** | **0.002 (-0.267)** | | **0.011 (-0.217)** | **0.041 (-0.176)** | **0.003 (-0.257)** |
| Central Corneal Volume (CCV) | | **0.041 (-0.175)** | **0.040 (-0.176)** | | 0.215 (-0.107) | 0.942 (-0.006) | 0.108 (-0.139) |
| CNFractal Dimension (CNFrD) | | **0.020 (0.199)** | **0.017 (0.204)** | | **0.046 (0.172)** | 0.205 (0.109) | **0.029 (0.187)** |
| Anterior Keratometry K2 (K2 F) | | 0.369 (0.078) | 0.555 (0.051) | | 0.135 (0.129) | **0.022 (0.196)** | 0.241(0.101) |
| Anterior Astigmatism (AstigF) | | **0.025 (0.192)** | 0.057 (0.164) | | **0.018 (0.202)** | 0.097 (0.143) | **0.032 (0.184)** |
| Posterior Keratometry K1 (K1 B) | | 0.638 (0.041) | 0.601(0.045) | | 0.415 (-0.071) | **0.019 (-0.200)** | 0.793 (-0.023) |
| Posterior Keratometry K2 (K2 B) | | 0.917 (0.009) | 0.786 (0.023) | | 0.198 (-0.111) | **0.024 (-0.193)** | 0.575 (-0.049) |
| Posterior Asphericity indices (Asph.QB) | | **0.035 (0.181)** | 0.104 (0.140) | | 0.616 (-0.043) | 0.812 (-0.021) | 0.338 (0.083) |
| Posterior Corneal Elevation (PCE) | | **0.019 (-0.202)** | **0.039(-0.177)** | | 0.310 (-0.088) | 0.089 (-0.147) | 0.061 (-0.161) |
|  | | Total COD0-2 | Total COD2-6 | | Total COD6-10 | Total COD10-12 | Total COD |
| Spherical Equivalent Refraction | | **0.005 (-0.240)** | **0.004 (-0.243)** | | 0.403 (-0.072) | 0.228 (-0.104) | **0.023 (-0.195)** |
| Spherical Equivalent Refraction Severity | | **0.008 (0.226)** | **0.009 (0.225)** | | 0.481 (0.061) | 0.287 (0.092) | **0.039 (0.178)** |
| Axial Length (AL) | | **0.009 (0.225)** | **0.007 (0.230)** | | 0.743 (-0.028) | 0.847 (-0.017) | 0.112 (0.137) |
| Central Corneal Thickness (CCT) | | **0.006 (-0.236)** | **0.010 (-0.221)** | | 0.142 (-0.127) | 0.239 (-0.102) | **0.014 (-0.210)** |
| Central Nerve Fiber Width (CNFW) | | 0.800 (-0.022) | 0.704 (-0.033) | | **0.032 (-0.184)** | 0.131 (-0.130) | 0.229 (-0.104) |
| Anterior Keratometry K1 (K1 F) | | 0.772 (-0.025) | 0.486 (-0.060) | | 0.498 (0.059) | **0.008 (0.226)** | 0.732 (0.030) |
| Anterior Keratometry K2 (K2 F) | | 0.173 (0.118) | 0.397 (0.073) | | 0.079 (0.151) | **0.002 (0.265)** | 0.087 (0.147) |
| Anterior Astigmatism (AstigF) | | **0.002 (0.265)** | **0.005 (0.241)** | | **0.020 (0.200)** | 0.119 (0.134) | **0.005 (0.238)** |
| Anterior Asphericity indices (Asph.QF) | | 0.986 (0.002) | 0.986 (-0.002) | | 0.065 (-0.159) | **0.002 (-0.257)** | 0.196 (-0.111) |
| Posterior Keratometry K1 (K1 B) | | 0.591 (0.047) | 0.486 (0.060) | | 0.172 (-0.118) | **0.001 (-0.280)** | 0.543 (-0.053) |
| Posterior Keratometry K2 (K2 B) | | 0.883 (-0.013) | 0.882 (0.013) | | **0.046 (-0.172)** | **0.004 (-0.246)** | 0.291 (-0.091) |
| Posterior Asphericity indices (Asph.QB) | | **0.023 (0.194)** | 0.058 (0.163) | | **0.011 (-0.217)** | **0.006 (-0.233)** | 0.893 (-0.012) |
| Posterior Corneal Elevation (PCE) | | **0.014 (-0.210)** | **0.022 (-0.197)** | | 0.977 (0.003) | 0.682 (-0.035) | - 1. 1(-0.127) |
| 1. Multiple linear regression was used to determine the correlation between clinical metrics and corneal optical density, after adjusting for age and gender. P < 0.05 was considered statistically significant. 2. P-values less than 0.05 are marked in red bold text to indicate statistical significance. 3. Data are expressed as p-value (r value). 4. Spherical Equivalent Refraction Severity was defined as follows: low myopia (LM) from -0.50 D to -3.00 D, moderate myopia (MM) from greater than -3.00 D to -6.00 D, high myopia (HM) from greater than -6.00 D to -10.00 D, and extreme high myopia (EHM) more negative than -10.00 D. | | | | | | | |
